# Supplementary material for: Change in covid-19 risk over time following vaccination with CoronaVac: test negative case-control study
Source: PubMed Central journal article supplement — BMJ. 2022 Jun 13;377:e070102. doi: 10.1136/bmj-2022-070102 (PMC9189440; doi:10.1136/bmj-2022-070102), 2022-06-13
Supplement: hitm070102.ww1.pdf [file hitm070102.ww1.pdf]

**Change in covid-19 risk over time following vaccination with CoronaVac: A test-negative case-control study**

**Supplementary Material**

p2: Supplementary Methods

p4: Supplementary Table A

p6: Supplementary Figure A

p7: Supplementary Table B

p8: Supplementary Table C

p10: Supplementary Table D

p11: Supplementary Figure B

p12: Supplementary Figure C

p13: Supplementary Table E

p14: Supplementary Table F

p15: Supplementary Figure D

p16: Supplementary Figure E

p17: Supplementary Figure F

p18: Supplementary Figure G

p19: Supplementary Figure H

## **Supplementary Methods**

### *Matching*

Matching was performed as follows. Strata defined by unique combinations of the matching factors were formed (“matched sets”), and strata with no cases, or with no controls, were excluded. To improve computational performance of the models while retaining the majority of cases, large strata were reduced in size by dividing into smaller strata. In strata with more controls than cases, each case was matched to up to five controls, and vice versa. For strata with at least five times as many controls as cases, excess controls were discarded, and vice versa. In this way, strata sizes varied from two to six.

### *Secondary and Sensitivity Analyses*

As a secondary analysis, we included time since vaccination as a continuous variable and modelled the association with case status using penalized spline regression. To account for missing race data, we performed multiple imputation of the race variable using 50 imputed data sets with predictive mean matching, using the mice package to perform multiple imputation[1]. Finally, we performed three sensitivity analyses varying aspects of the study design. To better exclude individuals who might have had prior SARS-CoV-2 infection, we excluded any individuals with prior ARI. To control for changing variant distribution during the study period, we restricted the period to August 8<sup>th</sup> to December 14<sup>th</sup>, 2020, in which the prevalence of the Delta variant in São Paulo State was >25%[2]. Finally, we estimated vaccine effectiveness in the same time categories by including all individuals regardless of vaccination status, and running the same models with unvaccinated individuals as the reference group. As we only had data on HCW status for vaccinated individuals, this analysis was stratified by age only.

## **Supplementary Results**

### *Change in odds of covid-19 over time since vaccination*

A penalized spline regression showed similar patterns in odds of covid-19 over time by age and HCW status as the primary analysis (Supplementary Figure D).

### *Change in odds of severe covid-19 outcomes over time since vaccination*

The pattern of increased odds over time since vaccination was similar for covid-19 hospitalisation or death, and covid-19 death (Supplementary Figure E).

### *Sensitivity analyses*

Using multiple imputation to account for missing race returned very similar results (Supplementary Figure F), as did excluding individuals with any previous ARI (Supplementary Figure G). Restricting to tests performed during the period of Delta variant dominance, we lacked precision to examine patterns of symptomatic covid-19 odds over time by age and HCW status, but the pattern of changes in odds of covid-19 hospitalisation or death was similar (Supplementary Figure H).

### **Bibliography**

1. Buuren S van, Groothuis-Oudshoorn K. mice: Multivariate Imputation by Chained Equations in R. *J Stat Softw.* **2011**; 45(3):1–67.
2. GISAID. hCoV-19 Variants [Internet]. [cited 2021 Jul 7]. Available from: <https://www.gisaid.org/hcov19-variants/>

|                           | Item No | Recommendation                                                                                                                                                                       | Page No  |
|---------------------------|---------|--------------------------------------------------------------------------------------------------------------------------------------------------------------------------------------|----------|
| <b>Title and abstract</b> | 1       | (a) Indicate the study's design with a commonly used term in the title or the abstract                                                                                               | 1        |
|                           |         | (b) Provide in the abstract an informative and balanced summary of what was done and what was found                                                                                  | 2        |
| <b>Introduction</b>       |         |                                                                                                                                                                                      |          |
| Background/rationale      | 2       | Explain the scientific background and rationale for the investigation being reported                                                                                                 | 4        |
| Objectives                | 3       | State specific objectives, including any prespecified hypotheses                                                                                                                     | 4        |
| <b>Methods</b>            |         |                                                                                                                                                                                      |          |
| Study design              | 4       | Present key elements of study design early in the paper                                                                                                                              | 5        |
| Setting                   | 5       | Describe the setting, locations, and relevant dates, including periods of recruitment, exposure, follow-up, and data collection                                                      | 4-5      |
| Participants              | 6       | (a) Give the eligibility criteria, and the sources and methods of case ascertainment and control selection. Give the rationale for the choice of cases and controls                  | 5        |
|                           |         | (b) For matched studies, give matching criteria and the number of controls per case                                                                                                  | 5        |
| Variables                 | 7       | Clearly define all outcomes, exposures, predictors, potential confounders, and effect modifiers. Give diagnostic criteria, if applicable                                             | 5-6      |
| Data sources/measurement  | 8*      | For each variable of interest, give sources of data and details of methods of assessment (measurement). Describe comparability of assessment methods if there is more than one group | 4        |
| Bias                      | 9       | Describe any efforts to address potential sources of bias                                                                                                                            | 5-7      |
| Study size                | 10      | Explain how the study size was arrived at                                                                                                                                            | 8; Fig 1 |
| Quantitative variables    | 11      | Explain how quantitative variables were handled in the analyses. If applicable, describe which groupings were chosen and why                                                         | 5-6      |
| Statistical methods       | 12      | (a) Describe all statistical methods, including those used to control for confounding                                                                                                | 5-6      |
|                           |         | (b) Describe any methods used to examine subgroups and interactions                                                                                                                  | 5-6      |
|                           |         | (c) Explain how missing data were addressed                                                                                                                                          | 5-6      |
|                           |         | (d) If applicable, explain how matching of cases and controls was addressed                                                                                                          | 6        |
|                           |         | (e) Describe any sensitivity analyses                                                                                                                                                | 6-7      |
| <b>Results</b>            |         |                                                                                                                                                                                      |          |

|                  |     |                                                                                                                                                                                                   |                    |
|------------------|-----|---------------------------------------------------------------------------------------------------------------------------------------------------------------------------------------------------|--------------------|
| Participants     | 13* | (a) Report numbers of individuals at each stage of study—eg numbers potentially eligible, examined for eligibility, confirmed eligible, included in the study, completing follow-up, and analysed | 8; Fig 1, Supp Mat |
|                  |     | (b) Give reasons for non-participation at each stage                                                                                                                                              | Fig 1              |
|                  |     | (c) Consider use of a flow diagram                                                                                                                                                                | Fig 1              |
| Descriptive data | 14* | (a) Give characteristics of study participants (eg demographic, clinical, social) and information on exposures and potential confounders                                                          | 8; Table 1         |
|                  |     | (b) Indicate number of participants with missing data for each variable of interest                                                                                                               | Table 1            |
| Outcome data     | 15* | Report numbers in each exposure category, or summary measures of exposure                                                                                                                         | Table 1; Supp Mat  |

Supplementary Table A. STROBE checklist

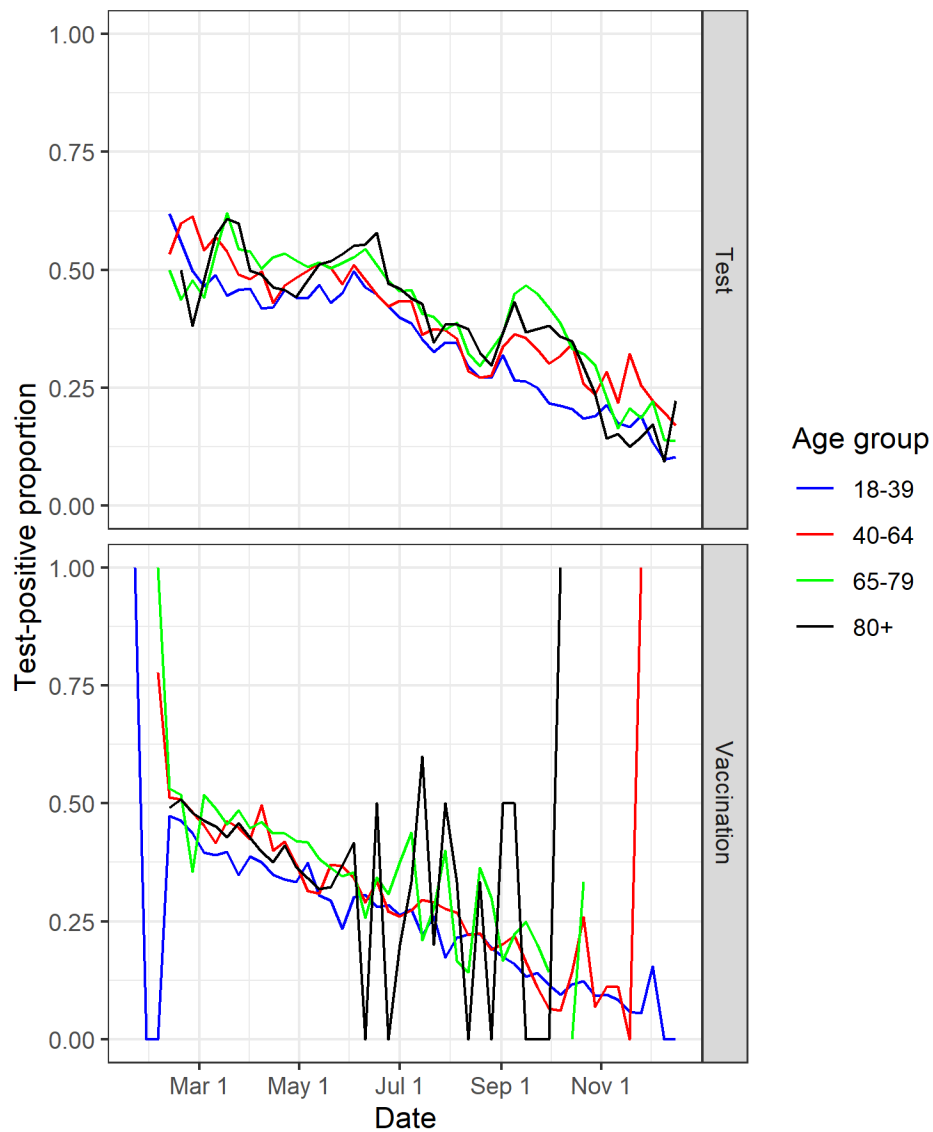

Supplementary Figure A. Proportion of RT-PCR tests that were positive by week of test performance (top) and by week of completion of primary vaccination series (bottom), by age group, in the study population.

|                    | Case<br>0-13 | Case<br>14-41 | Case<br>42-69 | Case<br>70-97 | Case<br>98-125 | Case<br>126-153 | Case<br>154-181 | Case<br>≥182 |
|--------------------|--------------|---------------|---------------|---------------|----------------|-----------------|-----------------|--------------|
| Control<br>0-13    | 3009         | 1495          | 351           | 206           | 69             | 36              | 19              | 12           |
| Control<br>14-41   | 1926         | 6078          | 1965          | 630           | 336            | 103             | 41              | 41           |
| Control<br>42-69   | 376          | 1604          | 5413          | 1575          | 524            | 206             | 58              | 67           |
| Control<br>70-97   | 242          | 452           | 1396          | 4667          | 1431           | 342             | 162             | 73           |
| Control<br>98-125  | 63           | 270           | 403           | 1269          | 4005           | 1018            | 289             | 159          |
| Control<br>126-153 | 27           | 61            | 191           | 306           | 872            | 2755            | 798             | 243          |
| Control<br>154-181 | 14           | 30            | 44            | 136           | 238            | 703             | 2164            | 721          |
| Control<br>≥182    | 9            | 26            | 36            | 51            | 133            | 212             | 531             | 2111         |

Supplementary Table B. Number of matched sets with discordant cases and controls by time since receipt of second dose (primary analysis)

|                                               |              | Non-HCWs            | HCWs             |
|-----------------------------------------------|--------------|---------------------|------------------|
| Variable                                      | Age subgroup | Odds ratio (95% CI) |                  |
| Age                                           | All          | 1.01 (1.00-1.02)    |                  |
| Race                                          |              |                     |                  |
| White/Branca                                  |              | Ref                 |                  |
| Brown/Pardo                                   |              | 0.77 (0.75-0.80)    |                  |
| Black/Preta                                   |              | 0.78 (0.73-0.83)    |                  |
| Yellow/Amarela                                |              | 0.93 (0.82-1.05)    |                  |
| Indigenous                                    |              | 1.70 (0.63-4.56)    |                  |
| Missing                                       |              | 1.12 (1.09-1.16)    |                  |
| Any prior ARI                                 |              | 0.46 (0.42-0.51)    |                  |
| Female sex                                    |              | 0.82 (0.8-0.85)     |                  |
| Number comorbidities                          |              |                     |                  |
| None                                          |              | Ref                 |                  |
| One-Two                                       |              | 1.30 (1.26-1.35)    |                  |
| Three or more                                 |              | 1.69 (1.53-1.85)    |                  |
| Days since second dose<br>(relative to 14-41) |              |                     |                  |
| 0-13                                          | 18-39        | 1.41 (1.26-1.57)    | 1.36 (1.18-1.56) |
| 42-69                                         |              | 1.38 (1.24-1.54)    | 1.42 (1.24-1.61) |
| 70-97                                         |              | 1.59 (1.38-1.82)    | 1.81 (1.57-2.09) |
| 98-125                                        |              | 1.63 (1.38-1.94)    | 2.45 (2.1-2.86)  |
| 126-153                                       |              | 1.75 (1.38-2.2)     | 2.92 (2.43-3.51) |
| 154-181                                       |              | 1.92 (1.43-2.58)    | 3.38 (2.75-4.15) |
| ≥182                                          |              | 1.67 (1.24-2.26)    | 4.22 (3.39-5.26) |
| 0-13                                          | 40-64        | 1.52 (1.32-1.76)    | 1.46 (1.25-1.72) |
| 42-69                                         |              | 1.10 (0.97-1.25)    | 1.13 (0.98-1.3)  |
| 70-97                                         |              | 1.14 (1.00-1.31)    | 1.31 (1.12-1.53) |



|         |                  |                  |                  |
|---------|------------------|------------------|------------------|
| 98-125  |                  | 1.04 (0.89-1.21) | 1.56 (1.31-1.84) |
| 126-153 |                  | 1.03 (0.85-1.23) | 1.72 (1.4-2.1)   |
| 154-181 |                  | 1.02 (0.81-1.3)  | 1.8 (1.43-2.26)  |
| ≥182    |                  | 1.04 (0.79-1.37) | 2.62 (2.03-3.38) |
| 0-13    | 65-79            | 1.49 (1.31-1.7)  | -                |
| 42-69   |                  | 1.13 (1.01-1.27) | -                |
| 70-97   |                  | 1.19 (1.02-1.38) | -                |
| 98-125  |                  | 1.17 (0.98-1.4)  | -                |
| 126-153 |                  | 1.29 (1.05-1.59) | -                |
| 154-181 |                  | 1.36 (1.07-1.72) | -                |
| ≥182    |                  | 1.40 (1.05-1.86) | -                |
| 0-13    |                  | 80+              | 1.22 (0.91-1.63) |
| 42-69   | 0.90 (0.70-1.17) |                  | -                |
| 70-97   | 1.08 (0.78-1.48) |                  | -                |
| 98-125  | 1.32 (0.91-1.91) |                  | -                |
| 126-153 | 1.58 (1.04-2.42) |                  | -                |
| 154-181 | 1.56 (0.99-2.48) |                  | -                |
| ≥182    | 1.65 (0.98-2.79) |                  | -                |

Supplementary Table C. Adjusted odds ratios for covid-19 by demographic characteristics and time since primary vaccination series

| Variable                                   | Odds ratio (95% CI) |
|--------------------------------------------|---------------------|
| Age                                        | 1.03 (1.01-1.05)    |
| Race                                       |                     |
| White/Branca                               | Ref                 |
| Brown/Pardo                                | 0.70 (0.65-0.76)    |
| Black/Preta                                | 0.74 (0.64-0.86)    |
| Yellow/Amarela                             | 0.92 (0.72-1.17)    |
| Indigenous                                 | 3.26 (0.43-24.47)   |
| Missing                                    | 0.83 (0.77-0.89)    |
| Any prior ARI                              | 0.29 (0.21-0.40)    |
| Female sex                                 | 0.65 (0.61-0.68)    |
| Number comorbidities                       |                     |
| None                                       | Ref                 |
| One-Two                                    | 2.79 (2.63-2.97)    |
| Three or more                              | 4.92 (4.30-5.63)    |
| Days since second dose (relative to 14-41) |                     |
| 0-13                                       | 1.51 (1.28-1.79)    |
| 42-69                                      | 1.10 (0.95-1.29)    |
| 70-97                                      | 1.25 (1.04-1.51)    |
| 98-125                                     | 1.37 (1.10-1.69)    |
| 126-153                                    | 1.49 (1.16-1.90)    |
| 154-181                                    | 1.75 (1.33-2.31)    |
| >=182                                      | 1.94 (1.41-2.67)    |

Supplementary Table D. Adjusted odds ratios for covid-19 hospitalisation or death by demographic characteristics and time since primary vaccination series

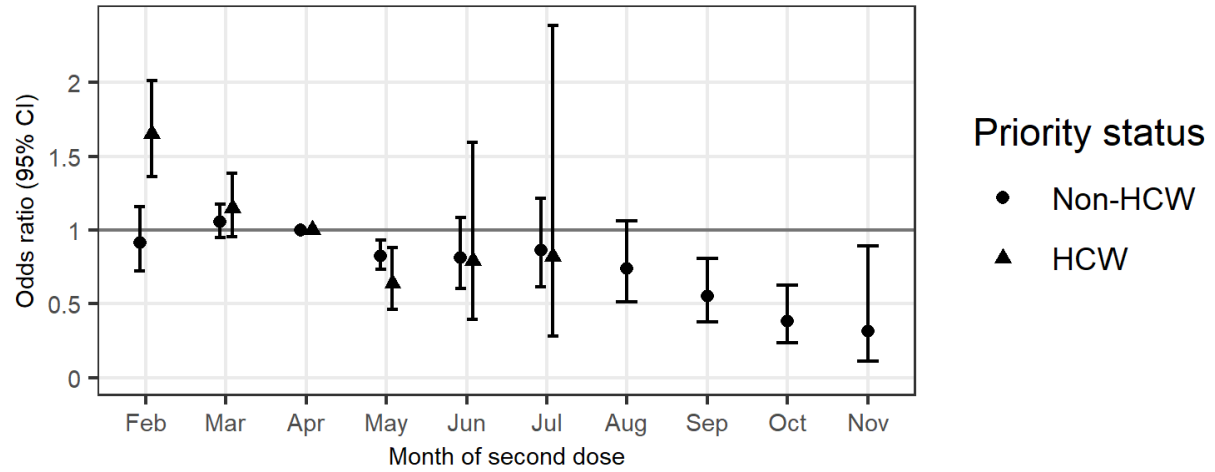

Supplementary Figure B. Odds ratio of symptomatic covid-19 by month of second dose, among individuals receiving an RT-PCR test within 14-90 days of their second dose, for non-HCWs (circles) and HCWs (triangles)

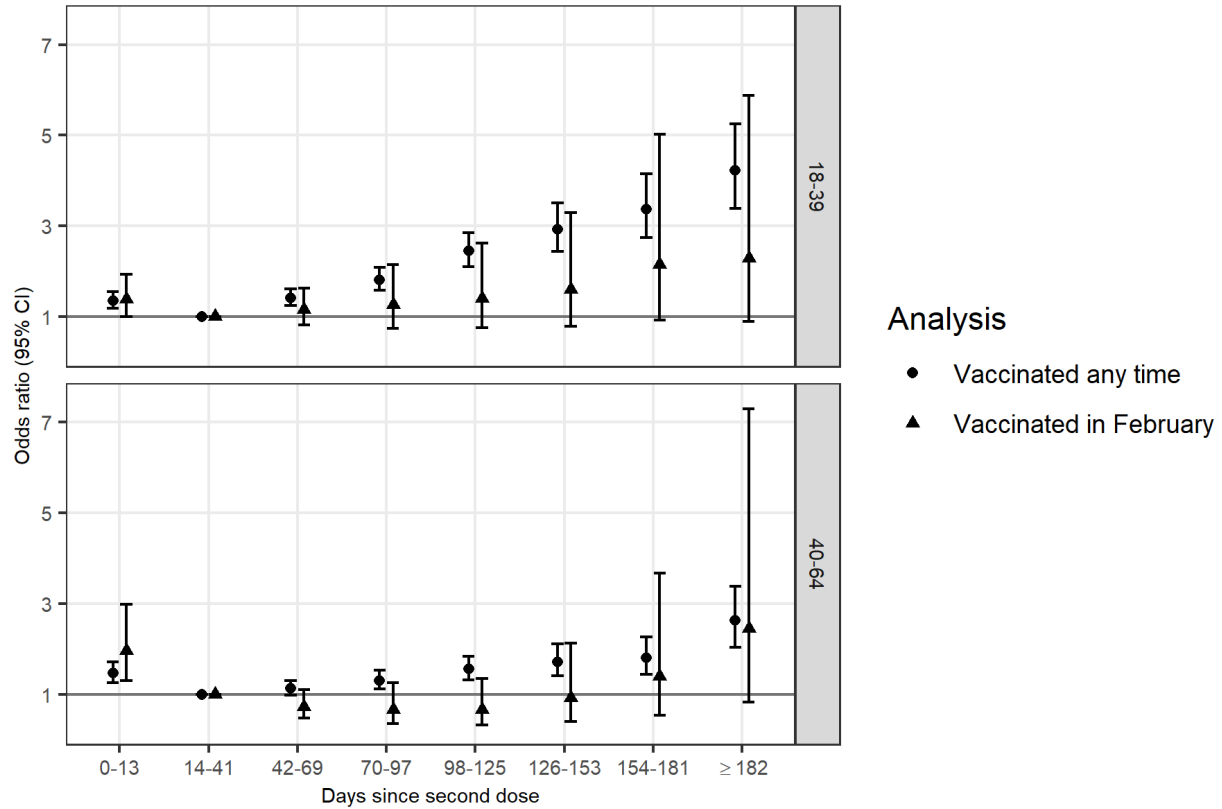

Supplementary Figure C. Odds ratio of symptomatic covid-19 for days since vaccination, relative to 14-41 days following vaccination for HCWs who received their second dose at any time (primary analysis, circles), and for HCWs who received their second dose in February 2021 (triangles), by age group (rows).

| Vaccination category | Vaccine effectiveness % (95% CI) |                       |                     |                     |
|----------------------|----------------------------------|-----------------------|---------------------|---------------------|
|                      | 18-39 years                      | 40-64 years           | 65-79 years         | ≥80 years           |
| Unvaccinated         | REF                              | REF                   | REF                 | REF                 |
| Dose 1 0-13 days     | -19.77 (-24.92--14.83)           | -6.51 (-12.67--0.70)  | 12.40 (5.68-18.65)  | 45.44 (32.59-55.84) |
| Dose 1 ≥14 days      | -1.00 (-5.18-3.01)               | -1.83 (-7.16-3.23)    | 3.82 (-3.38-10.52)  | 23.17 (7.13-36.44)  |
| Dose 2 0-13 days     | 10.45 (5.61-15.04)               | 12.78 (7.15-18.07)    | 21.02 (14.25-27.25) | 32.25 (17.57-44.31) |
| Dose 2 14-41 days    | 36.34 (33.52-39.04)              | 44.41 (41.79-46.91)   | 41.72 (37.54-45.61) | 41.53 (30.64-50.72) |
| Dose 2 42-69 days    | 21.06 (16.99-24.93)              | 39.85 (36.54-42.99)   | 36.75 (32.12-41.06) | 36.65 (25.07-46.44) |
| Dose 2 70-97 days    | 13.71 (9.05-18.13)               | 29.80 (25.84-33.55)   | 34.22 (28.92-39.12) | 29.39 (16.11-40.57) |
| Dose 2 98-125 days   | 10.20 (4.97-15.15)               | 29.25 (25.12-33.17)   | 29.84 (23.60-35.56) | 30.06 (16.46-41.44) |
| Dose 2 126-153 days  | 1.98 (-5.42-8.86)                | 21.17 (15.37-26.58)   | 19.61 (11.44-27.02) | 23.54 (7.16-37.02)  |
| Dose 2 154-181 days  | -10.57 (-20.69--1.30)            | 3.86 (-5.22-12.14)    | 9.26 (-1.79-19.11)  | 23.61 (5.14-38.49)  |
| Dose 2 ≥182 days     | -46.68 (-58.54--35.7)            | -19.79 (-30.64--9.83) | 2.39 (-12.64-15.42) | 15.49 (-8.83-34.37) |

Supplementary Table E. Vaccine effectiveness of one and two doses against symptomatic RT-PCR confirmed covid-19 by time since vaccination, by age categories

| Vaccination category | Vaccine effectiveness (95% CI) |                     |                     |                     |
|----------------------|--------------------------------|---------------------|---------------------|---------------------|
|                      | 18-39 years                    | 40-64 years         | 65-79 years         | ≥80 years           |
| Unvaccinated         | REF                            | REF                 | REF                 | REF                 |
| Dose 1 0-13 days     | 37.26 (22.74-49.05)            | 24.06 (11.58-34.78) | 29.55 (21.23-37.00) | 59.51 (45.81-69.74) |
| Dose 1 ≥14 days      | -11.72 (-34.2-6.99)            | 6.36 (-5.91-17.21)  | 20.52 (10.94-29.07) | 38.52 (21.35-51.94) |
| Dose 2 0-13 days     | 50.88 (34.23-63.31)            | 39.64 (28.37-49.13) | 43.29 (35.32-50.29) | 49.03 (34.24-60.48) |
| Dose 2 14-41 days    | 74.78 (66.95-80.76)            | 70.10 (66.12-73.61) | 61.27 (56.38-65.62) | 49.40 (36.95-59.40) |
| Dose 2 42-69 days    | 71.25 (61.27-78.66)            | 71.20 (66.59-75.18) | 62.68 (57.64-67.13) | 45.38 (32.21-55.99) |
| Dose 2 70-97 days    | 56.76 (43.25-67.06)            | 63.35 (57.47-68.42) | 57.52 (51.27-62.96) | 40.25 (25.56-52.05) |
| Dose 2 98-125 days   | 56.72 (42.69-67.31)            | 65.10 (59.38-70.02) | 58.01 (51.21-63.86) | 38.46 (22.86-50.91) |
| Dose 2 126-153 days  | 63.35 (46.25-75.00)            | 67.93 (61.04-73.60) | 50.42 (41.24-58.16) | 34.42 (16.14-48.71) |
| Dose 2 154-181 days  | 49.63 (19.22-68.59)            | 56.54 (43.21-66.74) | 45.25 (33.27-55.09) | 31.90 (10.67-48.09) |
| Dose 2 ≥182 days     | 28.88 (-9.28-53.71)            | 26.73 (6.46-42.61)  | 34.97 (17.59-48.68) | 20.24 (-8.05-41.13) |

Supplementary Table F. Vaccine effectiveness of one and two doses against RT-PCR confirmed covid-19 hospitalisation or death by time since vaccination, by age categories

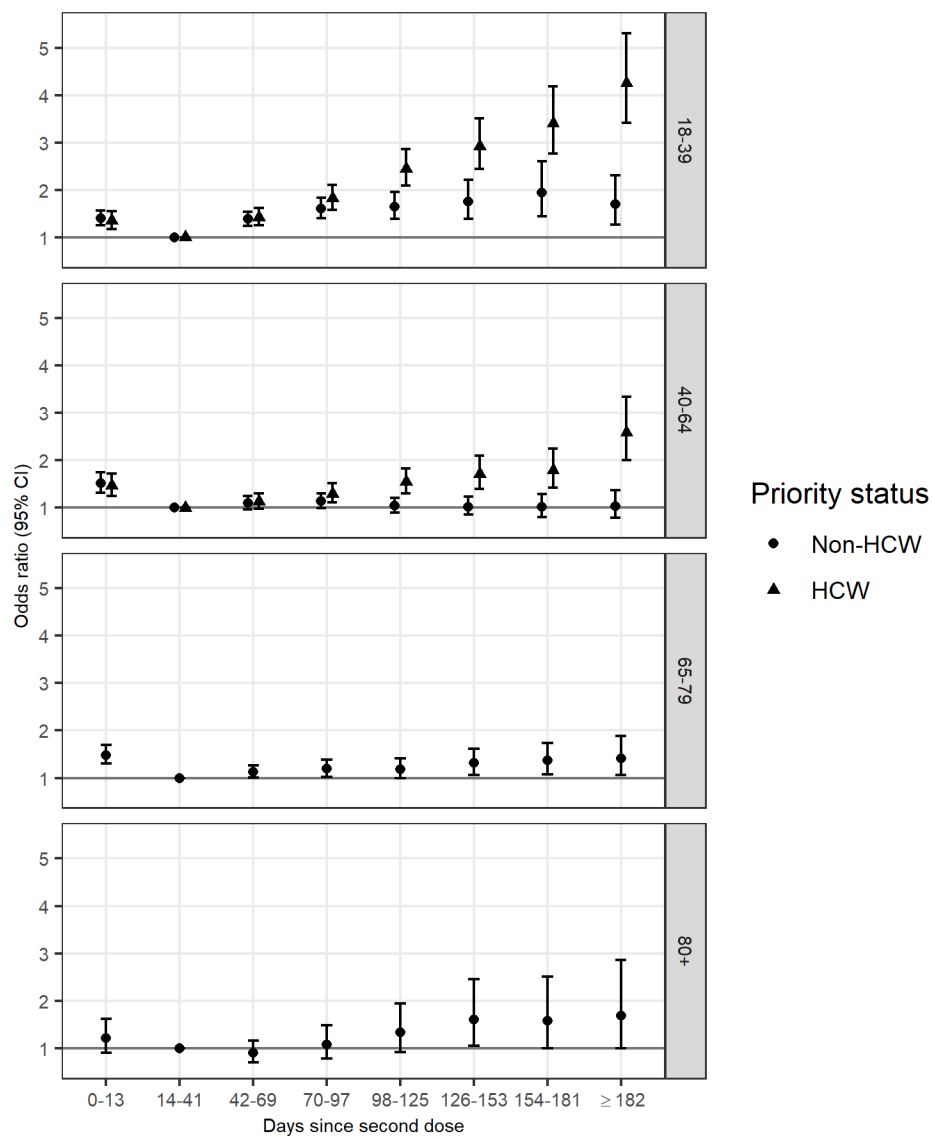

Supplementary Figure D. Odds ratio of symptomatic PCR-confirmed covid-19 disease against days since vaccination, relative to 14-41 days following vaccination, by age group (rows), for non-healthcare workers (circles) and healthcare workers (triangles), using multiple imputation to account for individuals with missing race data

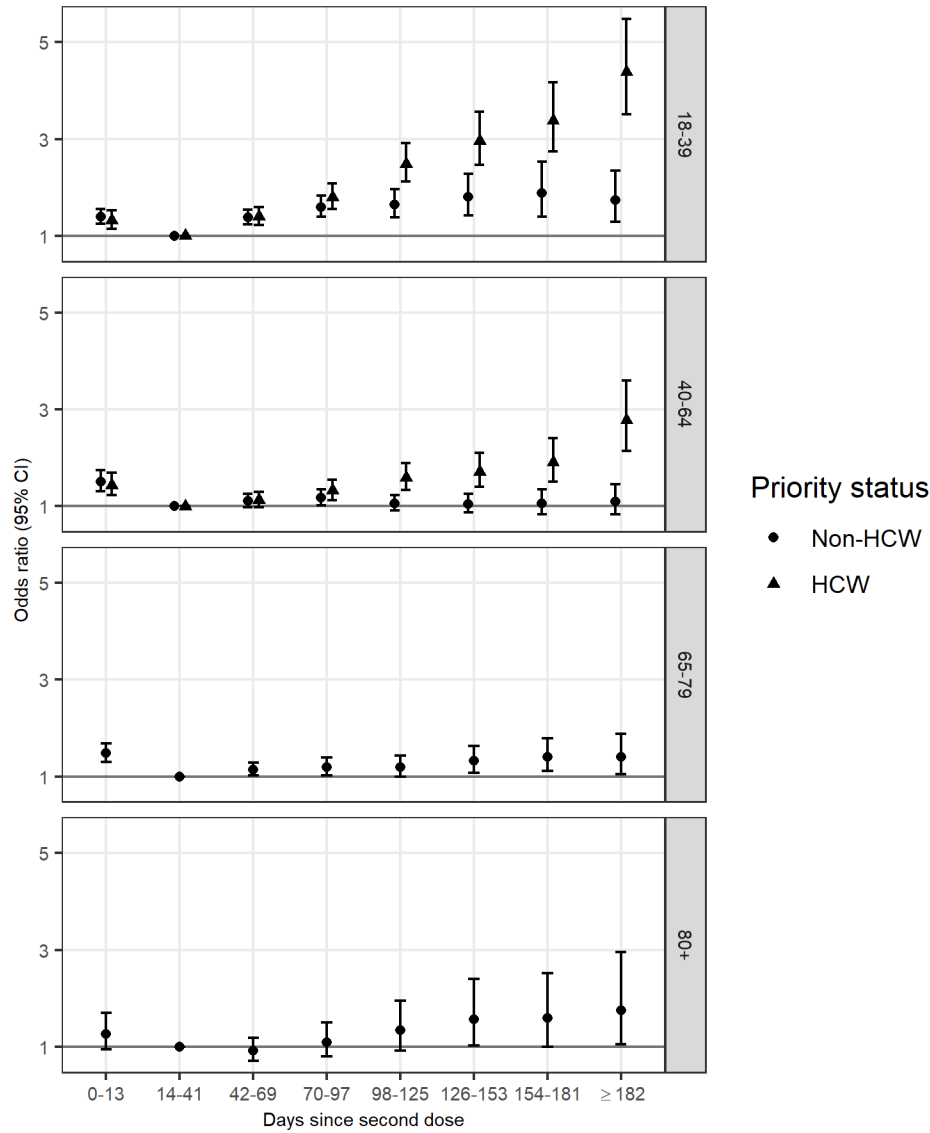

Supplementary Figure E. Odds ratio of symptomatic PCR-confirmed covid-19 disease against days since vaccination, relative to 14-41 days following vaccination, by age group (rows), for non-healthcare workers (circles) and healthcare workers (triangles), excluding individuals with any previous ARI



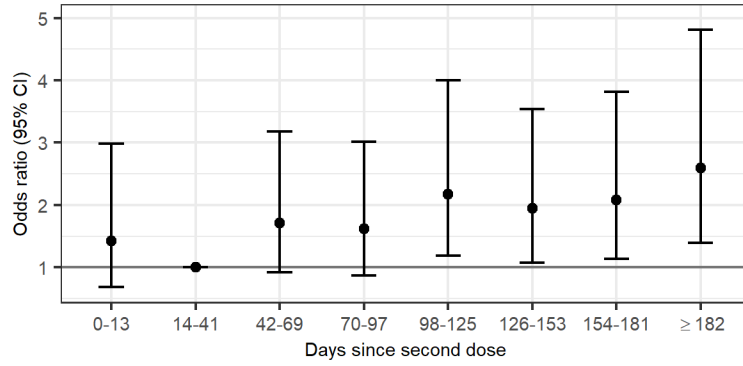

Supplementary Figure F. Odds ratio of PCR-confirmed covid-19 hospitalisation or death for days since vaccination, relative to 14-41 days following vaccination, restricting to tests that occurred during the period of Delta variant dominance (August 8<sup>th</sup>, 2020 to December 14<sup>th</sup>, 2020)

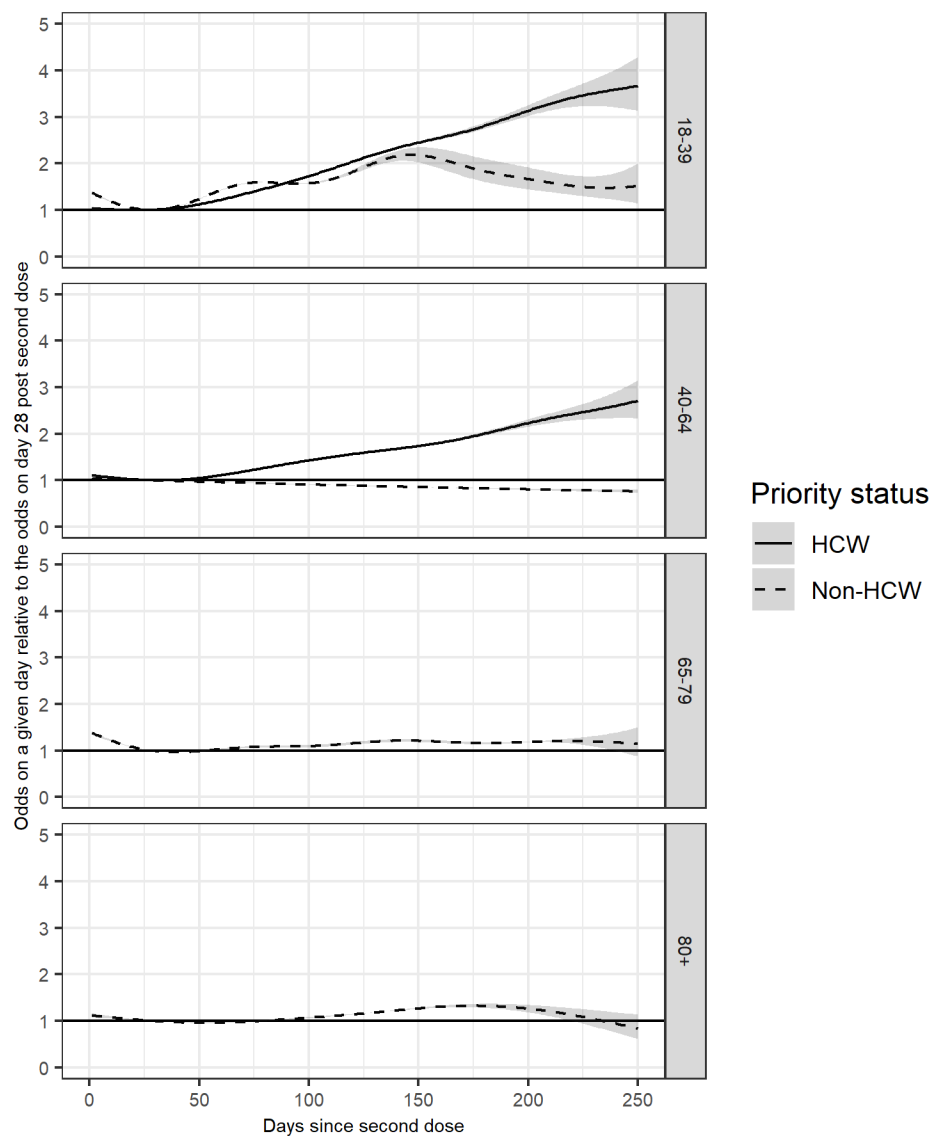

Supplementary Figure G. Odds ratio of symptomatic PCR-confirmed covid-19 over time since second dose receipt, relative to 28 days after second dose receipt, by age group (rows), for non-healthcare workers (dotted line) and healthcare workers (solid line)

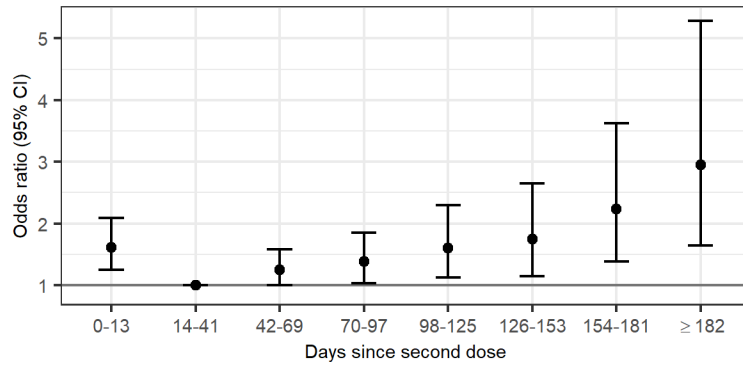

Supplementary Figure H. Odds ratio of PCR-confirmed covid-19 death for days since vaccination, relative to 14-41 days following vaccination
